# Supplementary material for: A Sandwich-Structured Piezoresistive Sensor with Electrospun Nanofiber Mats as Supporting, Sensing, and Packaging Layers
Source: MDPI journal article supplement (doi:10.3390/polym10060575), 2018-05-23
Supplement: s1 [file s1]

# Supporting Information

## A Sandwich-structured Piezoresistive Sensor with Electrospun Nanofiber Mats as Supporting, Sensing and Packaging Layers

Zicong Zhao,<sup>ab</sup> Bintian Li,<sup>ab</sup> Liqun Xu,<sup>ab</sup> Yan Qiao,<sup>ab</sup> Feng Wang,<sup>cd</sup> Qingyou Xia<sup>cd</sup> and  
Zhisong Lu<sup>\*ab</sup>

---

<sup>a</sup> Chongqing Key Laboratory for Advanced Materials & Technologies of Clean Energies, Southwest University, 1 Tiansheng Road, Chongqing 400715, P. R. China.

<sup>b</sup> Institute for Clean Energy & Advanced Materials, Faculty of Materials & Energy, Southwest University, 1 Tiansheng Road, Chongqing 400715, P. R. China.

<sup>c</sup> State Key Laboratory of Silkworm Genome Biology, Southwest University, Chongqing 400715, PR China.

<sup>d</sup> Chongqing Engineering and Technology Research Center for Novel Silk Materials, Southwest University, Chongqing 400715, PR China.

\*: Author to whom correspondence should be addressed. Tel.: +86-23-68254732; Fax: +86-23-68254969. E-mail: [zslu@swu.edu.cn](mailto:zslu@swu.edu.cn) (ZS Lu)

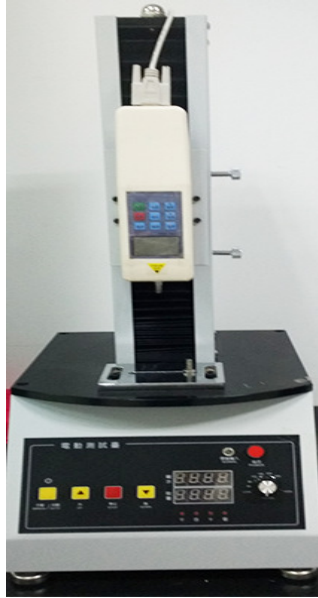

**Figure S1.** The apparatus used to perform different pressures in this experiment.

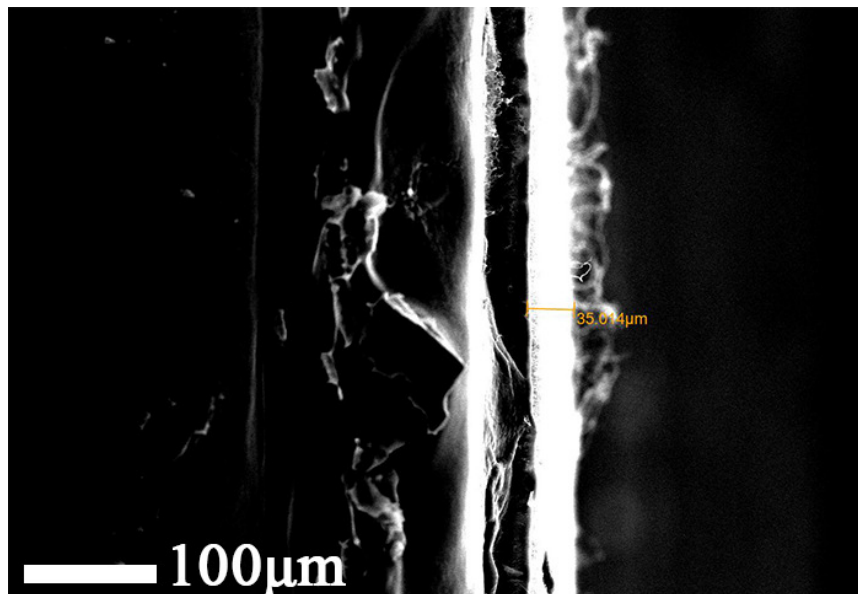

**Figure S2.** Side-view of a typical PLA-SF-COL nanofiber mat.

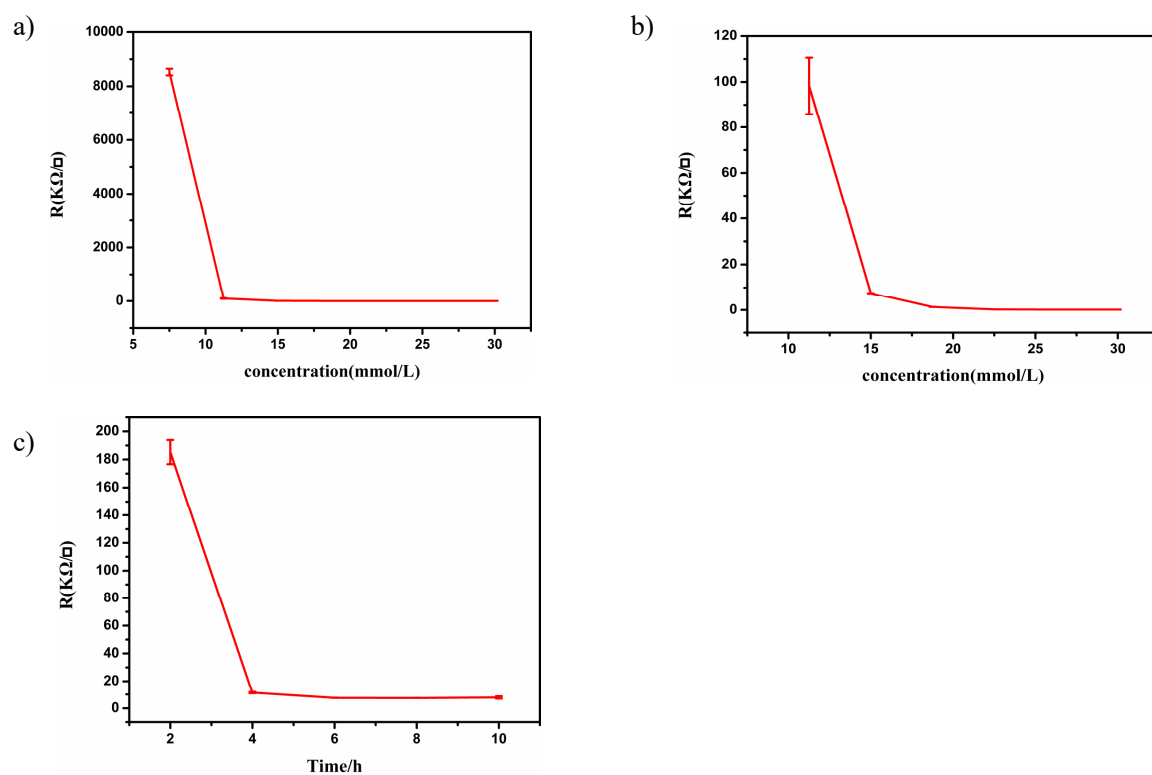

**Figure S3.** Resistance-concentration curve (a-b) of the conductive layer. (c) Resistance-time curve.

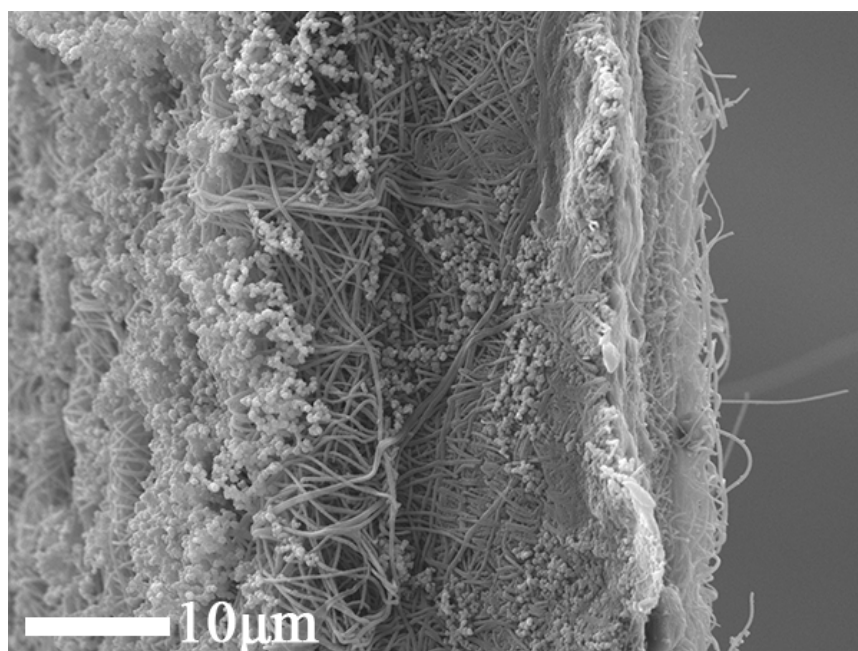

**Figure S4.** The cross-sectional SEM images of the PPy-modified nanofiber mat.

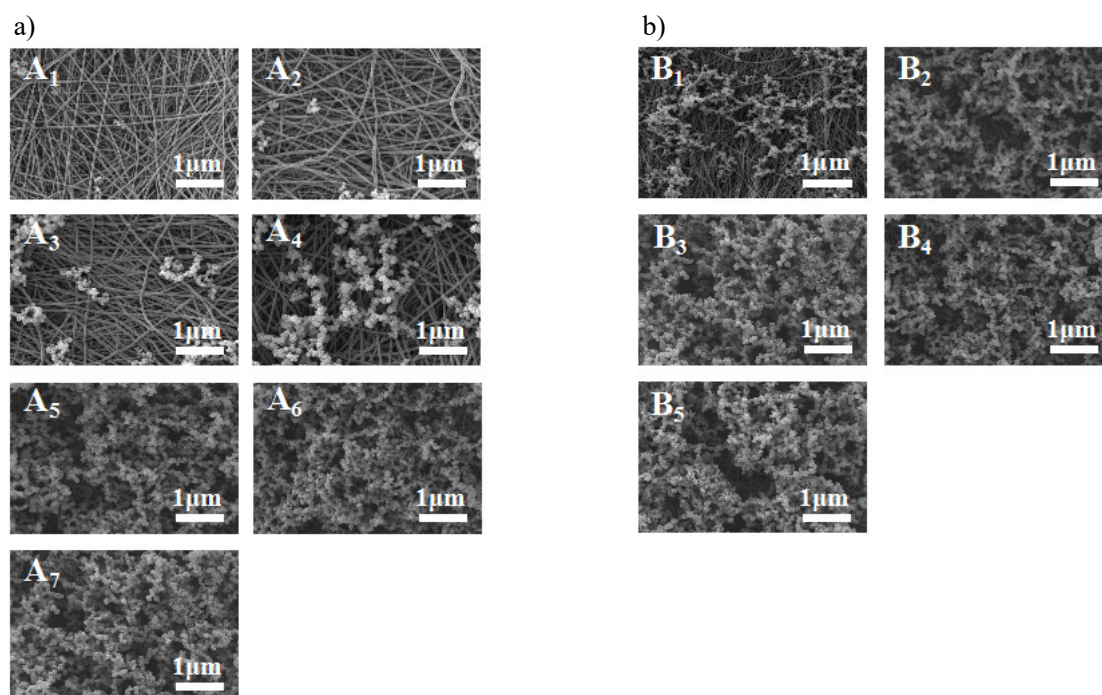

**Figure S5.** SEM images of (a) optimized Py concentration ( $A_1$ - $A_7$  represent the Py concentration from 7.5 mmol/L to 30 mmol/L, respectively) and (b) different polymerization time ( $B_1$ - $B_5$  represent the polymerization time from 2 h to 10 h, respectively).

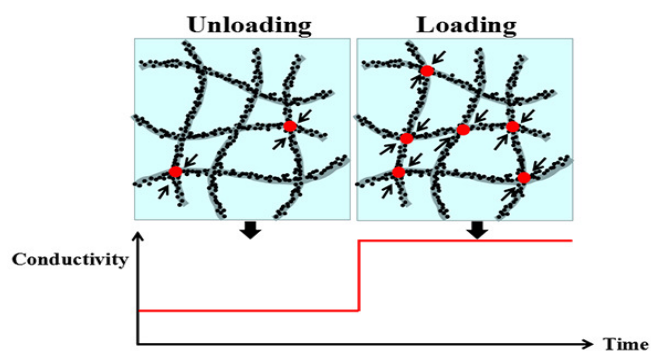

**Figure S6.** Sensing mechanism for the nanofiber mats-based piezoresistive devices.

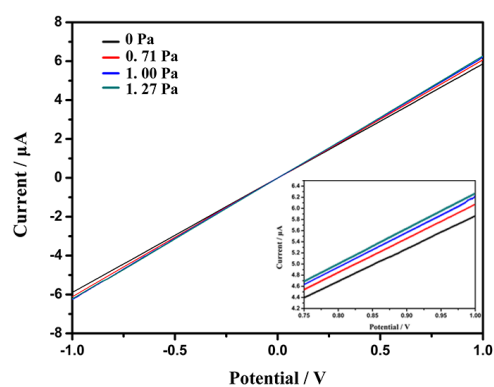

**Figure S7.** Current-voltage curves of the device under different pressures.

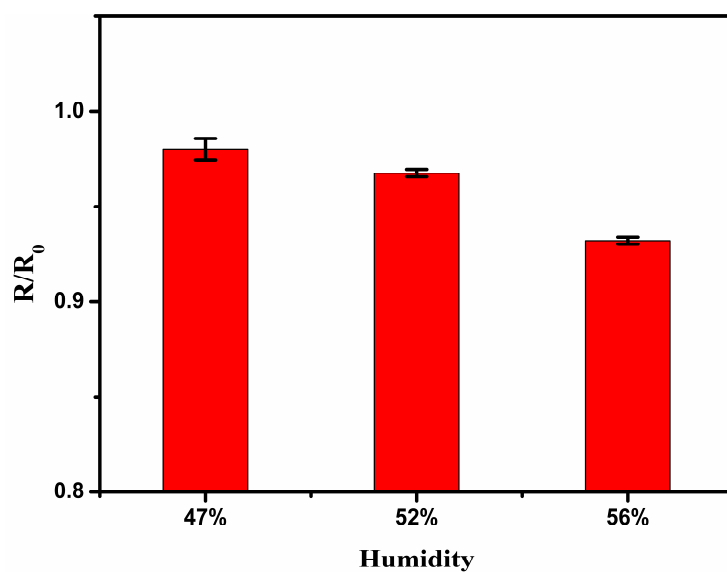

**Figure S8.** Resistance changes of the device to a certain pressure under different humidity.

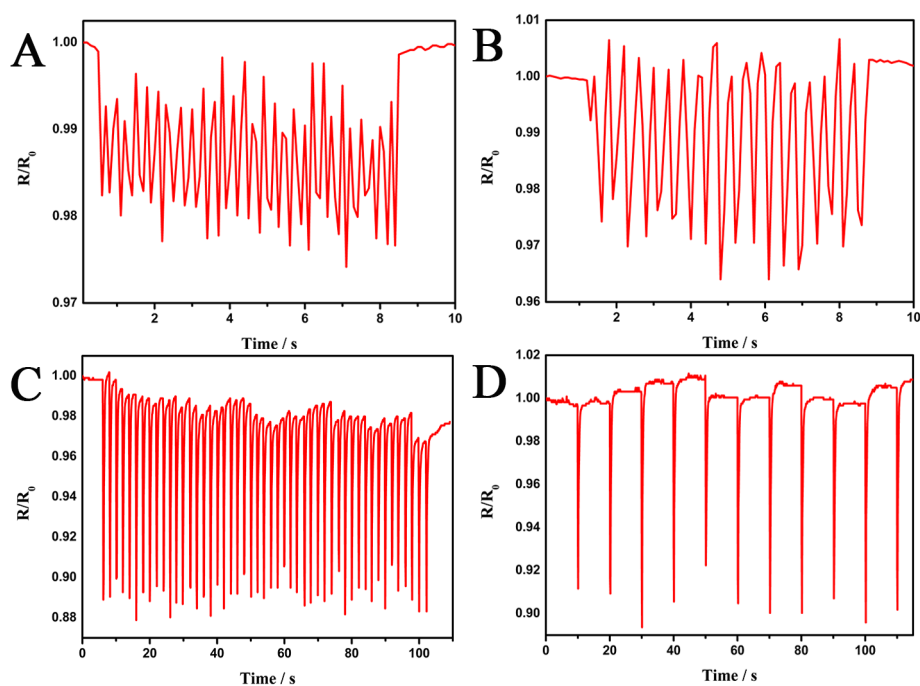

**Figure S9.** Responses of the electrospun mats-based piezoresistive sensor to tapping with different the frequencies. (A) 3.5 Hz, (B) 2.5 Hz, (C) 0.5 Hz and (D) 0.1 Hz.

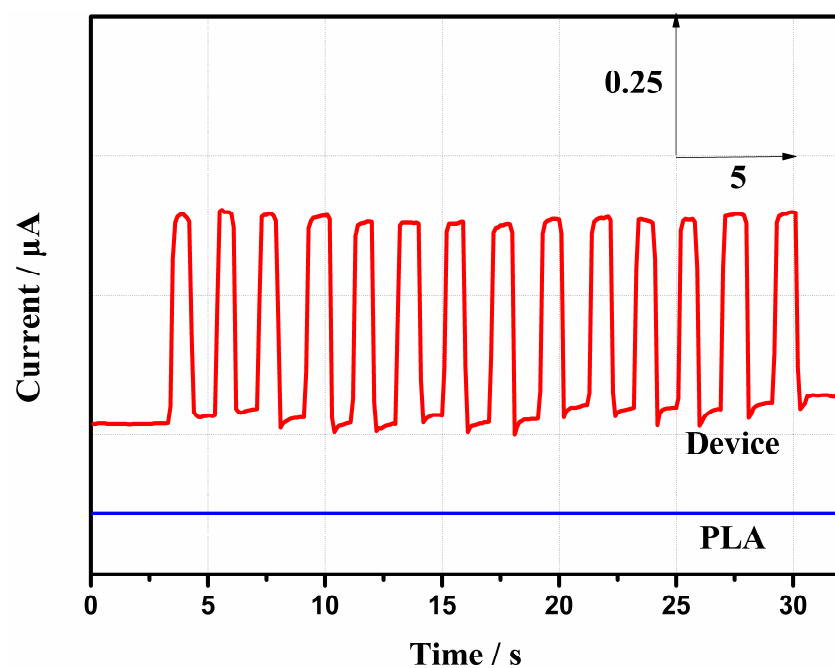

**Figure S10.** Effect of piezoelectric property of PLA on the device performance.

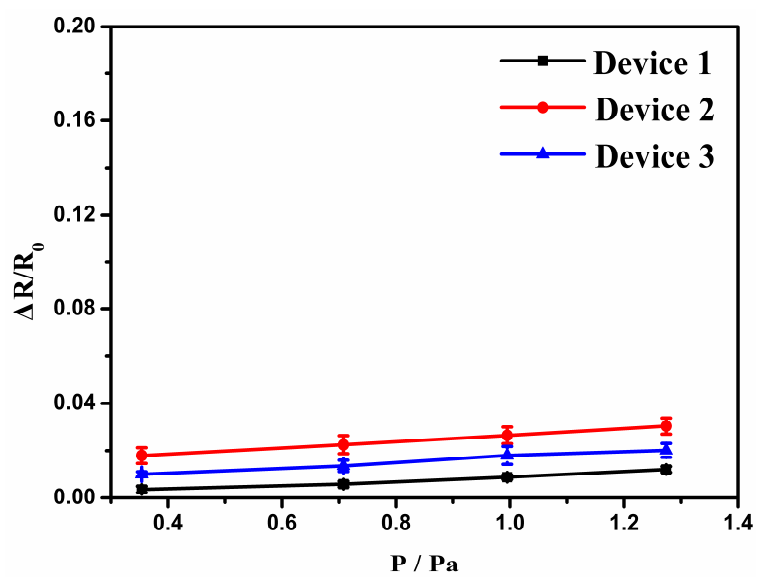

**Figure S11.** Run-to-run difference of the fabrication process.

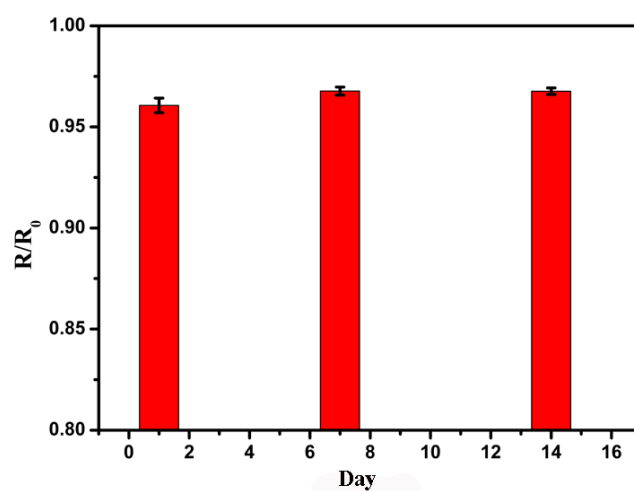

**Figure S12.** The long-term stability of the as-prepared device.

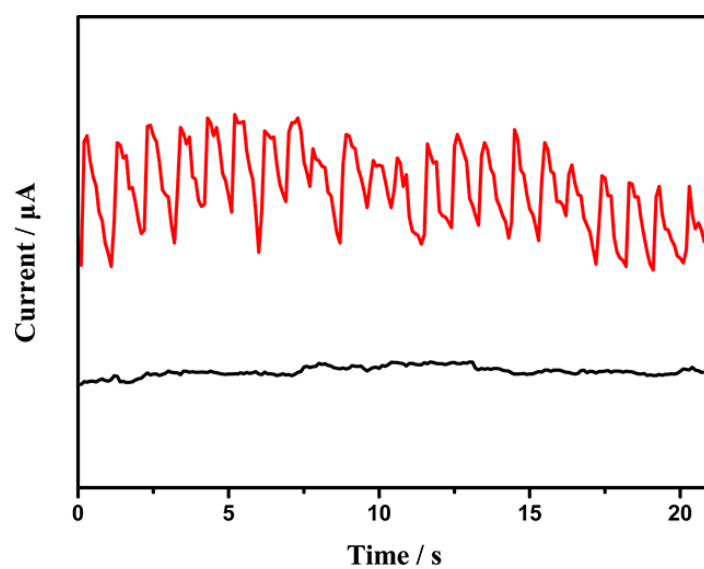

**Figure S13.** Real-time data of a device on wrist pulse region (red line) and other region (black line).
